# Supplementary material
Source: publisher figshare collection journal article supplement (https://sage.figshare.com/ndownloader/files/18725225)
Supplement: Supplementary file 1 [file 18725225]

## Sheet: vascular plasticity
category	ID	term	count	logFC	adj_pval	zscore
BP	GO:0001819	positive regulation of cytokine production	108	11.5084	5.24e-14	7.698
BP	GO:0007265	Ras protein signal transduction	94	7.69484	2.37e-10	5.56967
BP	GO:0050663	cytokine secretion	59	12.8167	1.16e-08	6.11888
BP	GO:0045862	positive regulation of proteolysis	73	10.7412	7.34e-08	4.79869
BP	GO:0048771	tissue remodeling	50	11.5084	1.47e-07	5.09117
BP	GO:0043277	apoptotic cell clearance	18	12.8167	3.23e-07	2.35702
BP	GO:0071559	response to transforming growth factor beta	51	10.7412	9.96e-07	6.30126
BP	GO:0032963	collagen metabolic process	30	9.56637	3.51e-06	4.38178
BP	GO:0016055	Wnt signaling pathway	83	10.7412	4.34e-06	5.59798
BP	GO:0043062	extracellular structure organization	60	10.3306	4.4e-05	6.45497
BP	GO:0031099	regeneration	34	8.04578	4.83e-05	4.80196
BP	GO:0048008	platelet-derived growth factor receptor signaling pathway	20	6.25518	6.7e-05	2.23607
BP	GO:0090287	regulation of cellular response to growth factor stimulus	55	10.7412	7.43e-05	6.87684
BP	GO:0007229	integrin-mediated signaling pathway	24	10.9836	0.000210291	2.44949
BP	GO:0031670	cellular response to nutrient	14	12.8167	0.000494243	2.67261
BP	GO:0007173	epidermal growth factor receptor signaling pathway	24	9.41912	0.000933605	4.08248
BP	GO:0071774	response to fibroblast growth factor	20	10.922	0.00832462	4.47214
BP	GO:1901342	regulation of vasculature development	86	12.8738	9.29e-12	6.03864
BP	GO:0048659	smooth muscle cell proliferation	50	9.20166	3.33e-09	5.65685
BP	GO:0034329	cell junction assembly	52	12.8738	1.95e-07	5.26965
BP	GO:0003158	endothelium development	33	9.02825	6.71e-06	4.35194
BP	GO:0097746	regulation of blood vessel diameter	40	10.0155	8.28e-06	3.79473
BP	GO:0014909	smooth muscle cell migration	28	9.058	8.35e-06	4.53557
BP	GO:0001936	regulation of endothelial cell proliferation	34	10.6173	1.82e-05	4.45896
BP	GO:0043542	endothelial cell migration	45	10.6173	2.83e-05	4.91935
BP	GO:0072577	endothelial cell apoptotic process	18	12.8167	0.000215847	2.82843
BP	GO:0002040	sprouting angiogenesis	28	9.23817	0.000507785	3.40168
BP	GO:0001570	vasculogenesis	23	9.23817	0.00137743	3.96177
BP	GO:0060674	placenta blood vessel development	12	10.3306	0.00318262	2.88675
CC	GO:0005911	cell-cell junction	97	10.922	5.16e-08	6.59975
CC	GO:0062023	collagen-containing extracellular matrix	73	10.9836	5.54e-07	5.73502
CC	GO:0031012	extracellular matrix	92	10.9836	5.49e-06	6.46395
CC	GO:0005912	adherens junction	58	10.922	9.55e-05	4.46442
MF	GO:0005178	integrin binding	37	10.7412	2.9e-06	3.78118
MF	GO:0005125	cytokine activity	51	11.9424	1.96e-05	5.18104
MF	GO:0005518	collagen binding	24	10.6173	1.99e-05	2.85774
MF	GO:0019838	growth factor binding	39	10.3306	2.22e-05	3.68295
MF	GO:0019955	cytokine binding	35	8.40854	3.16e-05	4.56383
MF	GO:0005126	cytokine receptor binding	67	11.9424	4.35e-05	6.23064
MF	GO:0070851	growth factor receptor binding	32	11.5084	0.00360713	4.94975
MF	GO:0050840	extracellular matrix binding	16	10.8339	0.0097198	2

## Sheet: neuroplasticity
category	ID	term	count	logFC	adj_pval	zscore
BP	GO:0042136	neurotransmitter biosynthetic process	35	9.75552	3.37e-08	3.88771
BP	GO:1901214	regulation of neuron death	78	9.20166	1.5e-07	6.56721
BP	GO:0010769	regulation of cell morphogenesis involved in differentiation	72	12.8738	1.07e-06	5.89256
BP	GO:0001505	regulation of neurotransmitter levels	75	10.0155	6.47e-06	4.73427
BP	GO:0031346	positive regulation of cell projection organization	85	12.8738	2.87e-05	6.39945
BP	GO:0007163	establishment or maintenance of cell polarity	47	7.30876	3.14e-05	5.10527
BP	GO:0045666	positive regulation of neuron differentiation	83	10.1945	4.86e-05	7.13468
BP	GO:0061564	axon development	88	10.922	5.48e-05	6.18282
BP	GO:0050808	synapse organization	79	10.922	6.89e-05	6.413
BP	GO:0016358	dendrite development	58	7.94497	7.11e-05	5.25226
BP	GO:0048588	developmental cell growth	52	10.922	0.000141784	4.4376
BP	GO:0120031	plasma membrane bounded cell projection assembly	84	9.23817	0.000561435	5.45545
BP	GO:0007219	Notch signaling pathway	38	9.02825	0.000793437	3.89331
BP	GO:0060563	neuroepithelial cell differentiation	20	6.87611	0.00119332	3.57771
BP	GO:0014041	regulation of neuron maturation	8	2.29248	0.00180239	0.707107
BP	GO:0030900	forebrain development	66	10.1945	0.0020709	6.89312
BP	GO:0099149	regulation of postsynaptic neurotransmitter receptor internalization	9	4.02558	0.00333873	1.66667
BP	GO:0001764	neuron migration	35	12.8167	0.00475934	4.56383
BP	GO:0007611	learning or memory	50	10.0155	0.00475934	4.24264
BP	GO:0042551	neuron maturation	14	8.89163	0.00533529	2.13809
BP	GO:0042552	myelination	29	8.77789	0.00796122	3.15682
BP	GO:0001819	positive regulation of cytokine production	108	11.5084	5.24e-14	7.698
BP	GO:0007265	Ras protein signal transduction	94	7.69484	2.37e-10	5.56967
BP	GO:0050663	cytokine secretion	59	12.8167	1.16e-08	6.11888
BP	GO:0045862	positive regulation of proteolysis	73	10.7412	7.34e-08	4.79869
BP	GO:0048771	tissue remodeling	50	11.5084	1.47e-07	5.09117
BP	GO:0043277	apoptotic cell clearance	18	12.8167	3.23e-07	2.35702
BP	GO:0071559	response to transforming growth factor beta	51	10.7412	9.96e-07	6.30126
BP	GO:0032963	collagen metabolic process	30	9.56637	3.51e-06	4.38178
BP	GO:0016055	Wnt signaling pathway	83	10.7412	4.34e-06	5.59798
BP	GO:0043062	extracellular structure organization	60	10.3306	4.4e-05	6.45497
BP	GO:0031099	regeneration	34	8.04578	4.83e-05	4.80196
BP	GO:0048008	platelet-derived growth factor receptor signaling pathway	20	6.25518	6.7e-05	2.23607
BP	GO:0090287	regulation of cellular response to growth factor stimulus	55	10.7412	7.43e-05	6.87684
BP	GO:0007229	integrin-mediated signaling pathway	24	10.9836	0.000210291	2.44949
BP	GO:0031670	cellular response to nutrient	14	12.8167	0.000494243	2.67261
BP	GO:0007173	epidermal growth factor receptor signaling pathway	24	9.41912	0.000933605	4.08248
BP	GO:0071774	response to fibroblast growth factor	20	10.922	0.00832462	4.47214
CC	GO:0014069	postsynaptic density	89	10.922	4.1e-09	1.802
CC	GO:0043197	dendritic spine	39	9.75552	0.00205358	3.04243
CC	GO:0062023	collagen-containing extracellular matrix	73	10.9836	5.54e-07	5.73502
CC	GO:0031012	extracellular matrix	92	10.9836	5.49e-06	6.46395
MF	GO:0005178	integrin binding	37	10.7412	2.9e-06	3.78118
MF	GO:0005125	cytokine activity	51	11.9424	1.96e-05	5.18104
MF	GO:0005518	collagen binding	24	10.6173	1.99e-05	2.85774
MF	GO:0019838	growth factor binding	39	10.3306	2.22e-05	3.68295
MF	GO:0019955	cytokine binding	35	8.40854	3.16e-05	4.56383
MF	GO:0005126	cytokine receptor binding	67	11.9424	4.35e-05	6.23064
MF	GO:0070851	growth factor receptor binding	32	11.5084	0.00360713	4.94975
MF	GO:0050840	extracellular matrix binding	16	10.8339	0.0097198	2
